1

2

# Understanding the impact of the COVID-19 pandemic on a socially deprived UK coastal town: a preliminary exploratory analysis of health and socioeconomic data

3

4

5

6

Maddy French<sup>1,\*</sup>, Mark Spencer<sup>3</sup>, Mike Walker<sup>4</sup>, Afzal

7

Patel<sup>4</sup>, Neil Clarke<sup>4</sup>, Ross Hughes<sup>5</sup>, Collette Taylor<sup>5</sup>,

8

Margaret Orwin<sup>5</sup>, Alicia Elliott<sup>5</sup>, Karl Worsley<sup>6</sup>, Julie Casson<sup>6</sup>,

9

Stephen Milan<sup>7</sup>, Mark Bowen<sup>8</sup>, Luigi Sedda<sup>2,\*</sup>

10

11 <sup>1</sup>Division of Health Research, Lancaster University

12 <sup>2</sup>Lancaster Medical School, Lancaster University

13 <sup>3</sup>Healthier Fleetwood

14 <sup>4</sup>Lancashire County Council

15 <sup>5</sup>NHS Midlands and Lancashire Commissioning Support Unit

16 <sup>6</sup>Department of Work and Pensions

17 <sup>7</sup>Health Engagement and Innovation Team, Lancaster University

18 <sup>8</sup>Research and Enterprise Services, Lancaster University

19 \* corresponding authors: [m.french4@lancaster.ac.uk](mailto:m.french4@lancaster.ac.uk); [l.sedda@lancaster.ac.uk](mailto:l.sedda@lancaster.ac.uk)

20

21 **Competing Interest Statement**

22 The authors have declared no competing interest.

23 **Funding Statement**

24 This work was funded by the NHS, Wyre Council, Healthier Fleetwood and Lancaster University EPSRC Impact  
25 Accelerator Account. We thank all the members of Healthier Fleetwood, Future Fleetwood and the Fleetwood  
26 public for their support.

27 **Author Declarations**

28 I confirm all relevant ethical guidelines have been followed, and any necessary IRB and/or ethics committee  
29 approvals have been obtained.

30 Yes

31 **The details of the IRB/oversight body that provided approval or exemption for the research described are**  
32 **given below:**

33 All authors have participated in the conception and design of the study. MF and LS analysed the data. All  
34 authors contributed to the interpretation of the data. MF drafted the first version of the manuscript. All the  
35 authors revised the drafts and approved its final version.

36 Ethical approval for collection and analyses of secondary data was obtained from the Ethics Committee at the  
37 Faculty of Health and Medicine at Lancaster University (FHMREC20121).

38

## 39 **Abstract**

### 40 **Introduction**

41 In addition to the direct impact of COVID-19 infections on health and mortality, a growing  
42 body of literature indicates there are wide-ranging indirect impacts of the COVID-19  
43 pandemic and associated public health measures on population health and wellbeing.  
44 Exploring these indirect impacts in the context of a socially deprived UK coastal town will  
45 help identify priority areas to focus COVID-19 recovery efforts on.

### 46 **Methods**

47 Data on primary care diagnosis, hospital admissions, and several socioeconomic outcomes  
48 between 2016 and Spring 2021 in the UK town of Fleetwood were collected and analysed in  
49 an exploratory analysis looking at pre- and post- COVID-19 patterns in health and social  
50 outcomes. Weekly and monthly trends were plotted by time and differences between  
51 periods examined using Chi-squared and t-tests.

### 52 **Results**

53 Initial falls in hospital admissions and diagnoses of conditions in primary care in March 2020  
54 were followed by sustained changes to health service activity for specific diagnostic and  
55 demographic groups, including for chronic kidney disease and young people. Increases in the  
56 number of people receiving Universal Credit and children eligible for free school meals  
57 appear to be greater for those in the least deprived areas of the town.

### 58 **Discussion**

59 These exploratory findings provide initial evidence of the sustained impact of the pandemic  
60 across several health and social outcomes. Examining these trends in multivariate analyses  
61 will further test these associations and establish the strength of the medium term impact of  
62 the pandemic on the population of this coastal town. Advanced modelling of this data is  
63 ongoing and will be published shortly.

64

## 65 Introduction

66 The arrival of COVID-19 has exposed and likely exacerbated decades of worsening  
67 health inequalities in many UK towns (1–3). For communities already tackling persistent  
68 and entrenched health and socioeconomic inequities, the pandemic has created additional  
69 challenges but may also offer opportunities for reform and change. As well as COVID-19  
70 infections having a direct impact on health and mortality, a growing body of literature  
71 suggests there are wide-ranging indirect impacts of the pandemic and associated public  
72 health measures on health and wellbeing (4–6).

73 The arrival of COVID-19 necessitated a substantial shift in focus within healthcare  
74 towards the care of people with acute COVID-19, and the protection of other patients and  
75 staff from infection. As would be expected, this had an indirect yet substantial impact on  
76 the patterns of healthcare use for other patients. Some of the reported short-term effects  
77 of the pandemic include an immediate drop in use of hospital and primary care services as  
78 people avoided non-urgent healthcare, and some healthcare services were paused, during  
79 the early months of the pandemic (4,5,7). The pause in access may also have indirect longer-  
80 term impacts on people with chronic health conditions. A small survey of Chronic  
81 Obstructive Pulmonary Disease (COPD) patients, for example, found that many experienced  
82 worsening of their COPD control during the 'lockdown' period (8). Other chronic conditions  
83 such as diabetes may have worsened for some people through the negative impact of  
84 reduced physical inactivity and increased food intake (9).

85 Several studies suggest the COVID-19 pandemic also had an immediate impact on  
86 healthcare provided to people with mental health needs in the UK. Primary care contacts  
87 for people with acute mental health conditions in the UK dropped considerably during this  
88 time, and for most conditions had not recovered to normal levels by July 2020 (4). The  
89 incidence of depression, anxiety disorders and first antidepressant prescribing was lower in  
90 April 2020 compared to previous years; by September these had returned to approximately  
91 normal levels in England but remained low in the rest of the UK (12).

92 Alongside these patterns in appearances at health services, the mental health needs of some  
93 population groups may have increased. The combination of the social determinants of

94 mental health with pandemic-related stressors is likely to exacerbate or create mental health  
95 burdens for marginalised, discriminated, or socially disadvantaged populations (13). There is  
96 consistent evidence suggesting the pandemic had a detrimental effect on mental health,  
97 particularly among women, young people, and those who were already financially insecure  
98 prior to the crisis (6,14,15).

99 At the same time COVID-19 impacted health and healthcare, it had an impact on the  
100 socioeconomic conditions of the communities affected by the pandemic. With a high share of  
101 employment sitting within the accommodation, leisure and tourism sectors, the UK is a  
102 country vulnerable to the negative economic impacts of the pandemic (16). While it is too  
103 early to estimate the long term impacts of the pandemic on household incomes, evidence  
104 from the 2008 global financial crash suggests that poverty began to increase several years  
105 after the crisis in reaction to austerity, highlighting the importance of policy responses to  
106 crises (17). Following the arrival of COVID-19 in the UK, attempts were made to cushion the  
107 economic impacts of the public health measures through the Job Retention Scheme and  
108 an uplift to the Universal Credit payments for those in unemployment (18). Nonetheless,  
109 some population groups experienced, and likely continue to experience, greater impacts on  
110 their finances. Low income families with young children reported increases in household  
111 expenditure in 2020, and long-term forecasts suggest more parents, and thus children, will  
112 be pushed into precarious financial circumstances (19).

113 A potential consequence of these economic impacts includes increased food insecurity and  
114 poor health. A survey tracking food standards in the UK during Covid-19 suggests that in  
115 March 2021 the level of food insecurity remained high, with 17% of respondents skipping  
116 meals or cutting the size of meals because they did not have enough money to buy food  
117 (20). Well established links between unemployment and poor health have also led to  
118 predictions of increased physical and mental health burdens potentially arising from  
119 pandemic-related unemployment (21,22).

120 The aim of this analysis is to explore the indirect impacts the COVID-19 pandemic has had on  
121 health and socioeconomic outcomes in a socially deprived coastal town in North West  
122 England. In this study we provide a preliminary assessment of the post-COVID-19 emerging  
123 trends for health and socioeconomic conditions in Fleetwood. This preliminary assessment will

124 be followed by a robust analysis of the spatial and temporal changes in outcomes between  
125 pre- and post- COVID-19 pandemic period, including the effect of different levels of  
126 deprivation in Fleetwood on these changes. Better understanding of the extent of the impact  
127 of the pandemic will help Fleetwood and similar coastal communities to prioritise recovery  
128 efforts for those most in need of support.

## 129 **Methods**

### 130 **Study setting**

131 Fleetwood is a coastal town in Lancashire home to approximately 30,000 people, many of  
132 whom were already experiencing poor health and living in disadvantaged socioeconomic  
133 circumstances prior to the pandemic (23). Forty-three percent of neighbourhoods in  
134 Fleetwood are amongst some of the 10% most deprived areas in the country and, like other  
135 deprived areas, experience some of the associated poor physical and mental health  
136 outcomes (24).

137 As a coastal community without a large employer or industry, Fleetwood is a place that is  
138 geographically and economically 'on the periphery', vulnerable to feeling the worst effects of  
139 phenomena such as financial crises and pandemics (25,26). It also has a population older than  
140 the English average, with 22% of its population aged over 65-years-old, compared to 18%  
141 nationally (27). A report released early on in the pandemic suggested that people in coastal  
142 areas were particularly vulnerable to the health and welfare effects of COVID-19 (28).  
143 However, coastal towns also offer opportunities to improve health and wellbeing, with good  
144 air quality and access to outdoors providing some protective effects against poor health (29).

### 145 **Data collection**

146 Data were originally collected as part of routine clinical care or routine service delivery and  
147 surveillance in Fleetwood (Table 1). Information about diagnosis in primary care and hospital  
148 admissions for patients registered at a Fleetwood GP practice was extracted and provided to  
149 the research team by the Midlands and Lancashire Commissioning Support Unit. These  
150 datasets included information on patient age band, sex, the Lower Layer Super Output Area  
151 (LSOA) for the area where the patient lived, and date of activity. Data from primary care were  
152 provided for the period April 2016 to June 2021. The dataset for hospital admissions also  
153 included the admission outcome, diagnosis, and secondary diagnoses upon admission. Data on

154 hospital admissions were provided for the period April 2016 to April 2021.

155 Data on the number of young people on apprenticeships or classed as Not in Education,  
156 Employment, or Training (NEET), and the number of pupils eligible to receive free school  
157 meals, were provided by Lancashire County Council, aggregated by month and area.  
158 Information about street crime (number of crimes by month and LSOA) were extracted by the  
159 research team from open access datasets published by the police([www.data.police.uk](http://www.data.police.uk)) for the  
160 period June 2018 - June 2021 (historic data are only available up to two years). The number of  
161 unemployment claimants in Fleetwood aggregated by month, LSOA, age band, and sex were  
162 extracted from the open access dataset published by the Department for Work and Pensions  
163 ([www.stat-xplore.dwp.gov.uk](http://www.stat-xplore.dwp.gov.uk)). Data on LSOA and Fleetwood population size by sex and age  
164 group were downloaded from open access datasets published by the Office for National  
165 Statistics ([www.nomisweb.co.uk](http://www.nomisweb.co.uk)).

166 Information about area income deprivation was collected from the English indices of  
167 deprivation 2019 (24). The indices of deprivation include the Index of Multiple Deprivation, a  
168 composite measure of area deprivation, made up of individual domains of deprivation across  
169 income, employment, education, health, crime, environment, and access to services. In this  
170 study, data on employment, education, health, and crime in the local area was already  
171 collected, meaning it was appropriate to use only the income deprivation domain from the  
172 indices of deprivation. Using one domain also offers greater conceptual clarity than the  
173 composite Index of Multiple Deprivation, which includes data on multiple mechanisms  
174 between socioeconomic characteristics and health outcomes.

175 The distribution of area income deprivation in Fleetwood is shown in Table 1. In this study,  
176 small areas aggregate into two categories: the most income deprived areas (deciles 1 and 2)  
177 and the least income deprived areas (deciles 3,5-7). There are no areas in income decile 4 in  
178 Fleetwood. Income deprivation is subsequently used as a dichotomous variable.

179

180

Table 1: Percentage of Fleetwood population by income deprivation area

| Income Decile | Number of LSOA areas | Income deprived | Percentage (%) |
|---------------|----------------------|-----------------|----------------|
| 1             | 43                   | Most            | 52             |
| 2             | 9                    |                 |                |
| 3             | 4                    | Least           | 49             |
| 5             | 19                   |                 |                |
| 6             | 14                   |                 |                |
| 7             | 11                   |                 |                |



181

182

Table 2: Variable descriptions

| Variable group                                                                  | Time period            | Variable                      | Categories/Values                             |
|---------------------------------------------------------------------------------|------------------------|-------------------------------|-----------------------------------------------|
| <i>Secondary care</i>                                                           |                        |                               |                                               |
| Hospital admissions                                                             | April 2016- April 2021 | Weekly rate of admissions of: | 0-14 year olds                                |
|                                                                                 |                        |                               | 15-24 year olds                               |
|                                                                                 |                        |                               | 25-44 year olds                               |
|                                                                                 |                        |                               | 45-64 year olds                               |
|                                                                                 |                        |                               | 65-84 year olds                               |
|                                                                                 |                        |                               | 85+ year olds                                 |
|                                                                                 |                        |                               | Males                                         |
|                                                                                 |                        |                               | Female                                        |
|                                                                                 |                        |                               | Patients from the most income deprived areas  |
|                                                                                 |                        |                               | Patients from the least income deprived areas |
| Patients whose primary diagnosis group upon admission is cancer related         |                        |                               |                                               |
| Patients whose primary diagnosis group upon admission is respiratory related    |                        |                               |                                               |
| Patients whose primary diagnosis group upon admission is cardiovascular related |                        |                               |                                               |
| Patients whose primary diagnosis group upon admission is mental health related  |                        |                               |                                               |
| Patients whose primary diagnosis group upon admission is renal related          |                        |                               |                                               |
| Patients whose primary diagnosis group upon admission is diabetes related       |                        |                               |                                               |

|                                             |                       |                                                       |                                                                                                                                                                                                                                                                                                                                                     |
|---------------------------------------------|-----------------------|-------------------------------------------------------|-----------------------------------------------------------------------------------------------------------------------------------------------------------------------------------------------------------------------------------------------------------------------------------------------------------------------------------------------------|
|                                             |                       |                                                       | <p>Patients whose primary diagnosis group upon admission is obesity related</p> <p>Patients <i>split by diagnosis (all possible diagnoses not listed here)</i></p> <p>Patients whose admission was unplanned</p> <p>Patients whose admission was planned</p> <p>Patients who died in hospital</p> <p>Patients who were discharged from hospital</p> |
| <i>Primary care</i>                         |                       |                                                       |                                                                                                                                                                                                                                                                                                                                                     |
| Separate primary care datasets listed below | April 2016- June 2021 | All primary care indicators available broken down by: | 0-24 year olds                                                                                                                                                                                                                                                                                                                                      |
|                                             |                       |                                                       | 25-64 year olds                                                                                                                                                                                                                                                                                                                                     |
|                                             |                       |                                                       | 65+ year olds                                                                                                                                                                                                                                                                                                                                       |
|                                             |                       |                                                       | Males                                                                                                                                                                                                                                                                                                                                               |
|                                             |                       |                                                       | Females                                                                                                                                                                                                                                                                                                                                             |
|                                             |                       |                                                       | Patients in the most income deprived areas                                                                                                                                                                                                                                                                                                          |
|                                             |                       |                                                       | Patients in the least income deprived areas                                                                                                                                                                                                                                                                                                         |
| Primary care consultations                  | April 2016- June 2021 | Weekly rate of consultations of:                      | <p>Emergency consultations</p> <p>Face to face consultations</p> <p>Home consultations</p> <p>Telephone consultations</p> <p>Consultations where the consultation type is missing</p>                                                                                                                                                               |
| Condition reviews in primary care           | April 2016- June 2021 | Weekly rate of reviews for                            | <p>Asthma Control</p> <p>Cancer</p> <p>COPD</p> <p>MRC Breathlessness Scale</p>                                                                                                                                                                                                                                                                     |

|                               |                       |                                             |                                                                                                                                                                                                                                                                                                                             |
|-------------------------------|-----------------------|---------------------------------------------|-----------------------------------------------------------------------------------------------------------------------------------------------------------------------------------------------------------------------------------------------------------------------------------------------------------------------------|
|                               |                       |                                             | Depression<br>Obesity<br>Frailty                                                                                                                                                                                                                                                                                            |
|                               |                       | Weekly rate of attendance for               | Diabetes Education<br>Weight Management Programme                                                                                                                                                                                                                                                                           |
| New diagnoses in primary care | April 2016- June 2021 | Weekly rate of new diagnoses for            | Atrial Fibrillation<br>Asthma<br>Cancer<br>Chronic heart disease<br>Chronic kidney disease<br>Chronic obstructive pulmonary disease (COPD)<br>Dementia<br>Depression<br>Diabetes<br>Heart Failure<br>Hypertension<br>Mental Health<br>Peripheral arterial disease (PAD)<br>Stroke TIA<br>Influenza<br>COVID (positive test) |
| Cancer registration data      | April 2016- June 2021 | Weekly rate of new cancer registrations for | Any cancer diagnosis<br>Site-specific cancers ( <i>all possible cancer diagnoses not listed here</i> )                                                                                                                                                                                                                      |
|                               |                       | Weekly rate of fast track referrals for     |                                                                                                                                                                                                                                                                                                                             |
| <i>Crime</i>                  |                       |                                             |                                                                                                                                                                                                                                                                                                                             |
| Street crime                  | June                  | Monthly rate of                             | In the most income deprived areas                                                                                                                                                                                                                                                                                           |

|                                                  |                             |                                                                                                                        |                                                                         |
|--------------------------------------------------|-----------------------------|------------------------------------------------------------------------------------------------------------------------|-------------------------------------------------------------------------|
|                                                  | 2018 -<br>June<br>2021      | recorded instances of all crime                                                                                        | In the least income deprived areas                                      |
|                                                  |                             | Monthly rate of recorded instances of violence and sexual offences                                                     | In the most income deprived areas<br>In the least income deprived areas |
|                                                  |                             | Monthly rate of recorded instances of anti-social behaviour disorder                                                   | In the most income deprived areas<br>In the least income deprived areas |
| <i>Employment</i>                                |                             |                                                                                                                        |                                                                         |
| Universal Credit claimants                       | Jan<br>2016-<br>May<br>2021 | Monthly rate of people claiming Universal Credit under the 'Searching for Work' condition (Alternative claimant count) | For ages 16-24                                                          |
|                                                  |                             |                                                                                                                        | For ages 25-49                                                          |
|                                                  |                             |                                                                                                                        | For ages 50+                                                            |
|                                                  |                             |                                                                                                                        | For males                                                               |
|                                                  |                             |                                                                                                                        | For females                                                             |
|                                                  |                             |                                                                                                                        | In the most income deprived areas                                       |
|                                                  |                             |                                                                                                                        | In the least income deprived areas                                      |
| <i>Education and attainment</i>                  |                             |                                                                                                                        |                                                                         |
| Not in Education, Employment, or Training (NEET) | Jan 2016 – Dec 2020         | Monthly rate of 16-24 year olds Not in Education, Employment, or Training (NEET)                                       | -                                                                       |
| Apprenticeships                                  | Jan 2016 – Dec              | Monthly rate of 16-24 year olds                                                                                        | -                                                                       |

|                                    |                                   |                  |                                    |
|------------------------------------|-----------------------------------|------------------|------------------------------------|
|                                    | 2020                              | on               |                                    |
|                                    |                                   | Apprenticeships  |                                    |
| <i>Other children-related data</i> |                                   |                  |                                    |
| Free school meals                  | 2016-<br>2020<br>(Year<br>totals) | Rate of pupils   | Male pupils                        |
|                                    |                                   | eligible to      | Female pupils                      |
|                                    |                                   | receive free     | Total pupils                       |
|                                    |                                   | school meals per | In the most income deprived areas  |
|                                    |                                   | 1000 pupils      | In the least income deprived areas |

183

184

## 185 **Statistical analysis**

186 An exploratory analysis was conducted to look at the associations between health and  
187 socioeconomic outcomes, the pandemic, and selected patient or population demographics. To examine  
188 differences between the pre- and post-pandemic periods, a dummy variable for pre-March 2020 (0s) and  
189 post-March 2020 (1s) was created. Where data was provided by week, the week beginning 16th March  
190 2020 was taken as the start of the pandemic in Fleetwood. For monthly aggregated data, the  
191 beginning of the pandemic was taken as 1st March 2020.

192 Weekly hospital admission rates stratified by age were created using Fleetwood population estimates  
193 for age bands 0-14, 15-24, 25-44, 45-64, 65-84, and 85+ as denominators. To calculate weekly rates of  
194 hospital admissions stratified by diagnosis, and of new diagnoses or consultations in primary care, the  
195 total Fleetwood population estimate was used. Total Fleetwood population estimates were available  
196 for years 2016-2019. Population rates for 2020 and 2021 were created using the 2019 population as  
197 the denominator.

198 For monthly rates of Universal Credit claimants in Fleetwood stratified by age, population estimates  
199 were calculated using population estimates for age bands 16-24, 25-54, and 55+ for years 2016-2021,  
200 which cover labour market age groups. Population rates for 2020 and 2021 were created using the  
201 2019 population as the denominator. Young adults who can be classed as NEET must be aged between  
202 16 and 24-year-olds. However, population estimates are only available for 15-17 and 18-24-year-olds.  
203 To create rates of young people on apprenticeships or NEET, population estimates of 15-24 year olds  
204 were used as a denominator

205 Rates and counts were plotted with time (month or week depending on data availability). Differences  
206 between the pre-March 2020 and post-March 2020 periods were tested using t-tests (continuous data)  
207 or Chi-squared tests (categorical data) when looking at group differences, with a p-value <0.05  
208 threshold for statistical significance.

## 209 **Results**

### 210 **Hospital admissions**

211 The unadjusted trend in overall hospital admissions of residents in Fleetwood is shown in Figure 1.  
212 These plots suggest there was a fall in hospital admissions following the onset of the COVID-19 pandemic in

213 March 2020 and low levels of overall hospital admissions have been sustained in the months since. The  
214 demographics patterns of patients being admitted to hospital changed following the pandemic for some  
215 patient groups. While the distribution of hospital admissions between patients of different sexes, or from  
216 difference income deprivation areas, remained similar in the post-March 2020 period (not shown), there  
217 were changes in the age demographics of patients being admitted to hospital (Figure 1). Figure 1 shows the  
218 time series trend in hospital admissions broken down by six age bands, indicating that admissions for  
219 patients aged between 0 and 24-years-old saw substantial falls.

## 220 **Hospital admissions by diagnosis**

221 Changes in hospital admission rates in the post-March 2020 period also differed depending on the  
222 primary diagnosis patients had upon admission. The time series trends of hospital admission rates for  
223 patients with a primary diagnosis of a respiratory condition, cardiovascular disease, and mental health  
224 are shown in Figure 2, as examples of some of the different trends in the post-March 2020 period.

### 225 *Admissions with a primary respiratory diagnosis*

226 Immediate falls in admissions where the primary diagnosis was respiratory-related in Spring 2020 were  
227 followed by sustained low admission rates up until the most recent week data were available for. As  
228 indicated in Figure 2 this remains the case even when COVID-19 admissions are included. Therefore it  
229 is unlikely that the fall in admissions for reasons relating to COPD and pneumonia was offset by the  
230 same patients being admitted with COVID-19, although there is likely to be some overlap. Prior to  
231 March 2020, admissions with a primary respiratory diagnosis accounted for 43% of all admissions,  
232 dropping in post-March 2020 to 37% (including COVID-19) and 27% (excluding COVID-19) (Table 3).

### 233 *Admissions with a primary cardiovascular diagnosis*

234 In contrast to respiratory-related admissions, admissions primarily related to cardiovascular disease  
235 dropped sharply after March 2020 but appear to have increased again to normal levels by Autumn  
236 2020.

### 237 *Admissions related to mental health*

238 Further patterns were observed for mental health-related hospital admissions. There was no apparent  
239 immediate impact in admissions of patients with a primary diagnosis of mental health following

240 March 2020, although in Spring 2021 there are indications that admissions begin to rise again,  
241 although this increase is no more extreme than what has been experienced in the pre-COVID time (e.g.  
242 2017).

243 However, there has been a sustained fall in admissions of patients with a secondary diagnosis of  
244 mental health in the post-March 2020 period. While the rate of Fleetwood population being admitted  
245 with a secondary mental health diagnosis fell, the proportion of all hospital admissions in this  
246 diagnosis category actually increased in the post-March 2020 period (31% to 38%,  $p < 0.01$ ) (Table 3).  
247 This likely indicates that admissions with a secondary mental health diagnosis did not fall as much as  
248 overall hospital admissions post-March 2020, or as much as other health conditions common to  
249 hospital admissions pre-March 2020 (e.g. non-COVID respiratory).

250

251



252

253

254

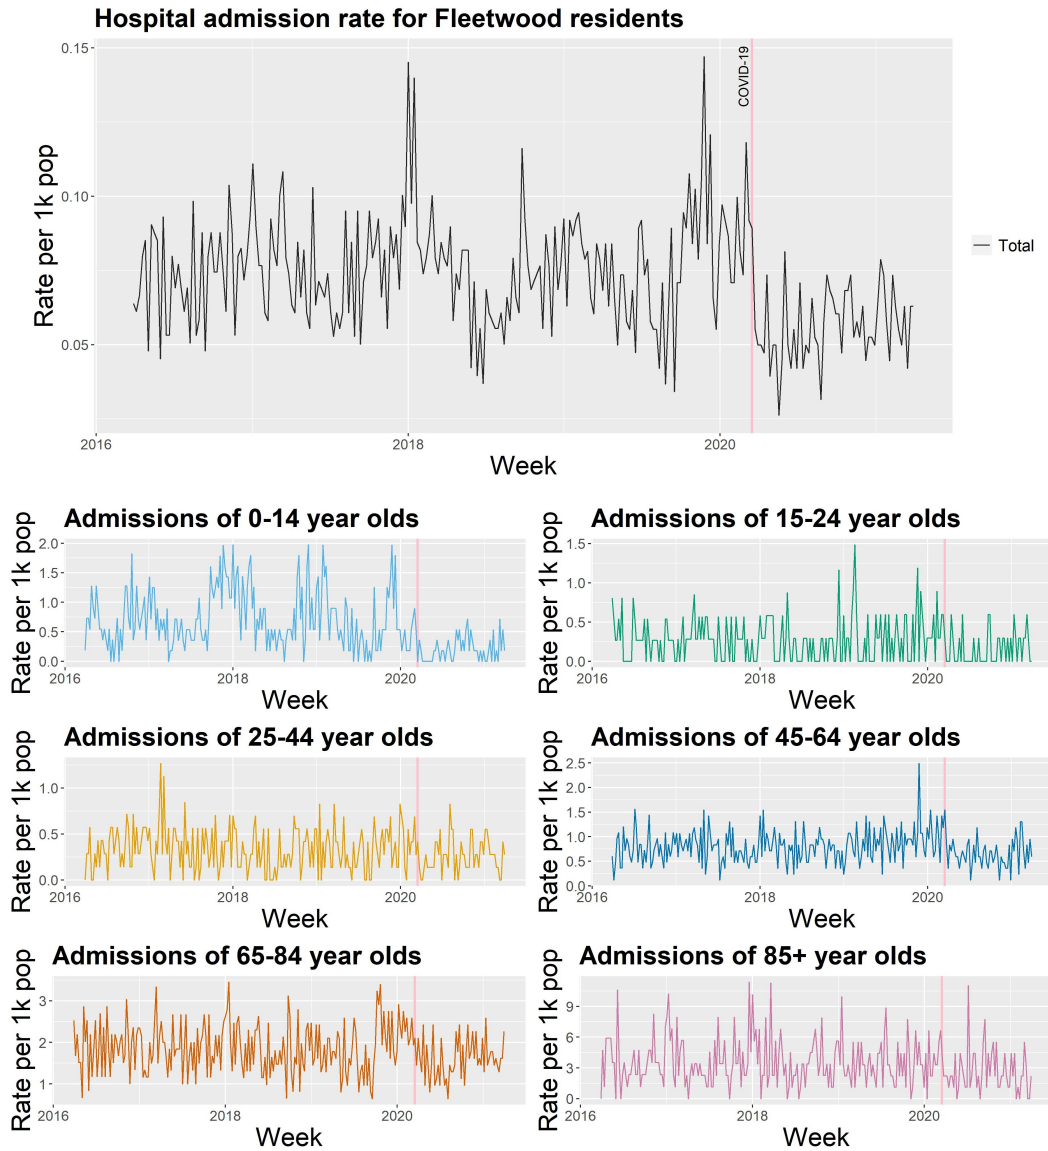

255

Figure 1: Weekly hospital admission rates stratified by age group

256

257

258

It is made available under a [CC-BY-NC-ND 4.0 International license](https://creativecommons.org/licenses/by-nc-nd/4.0/) .

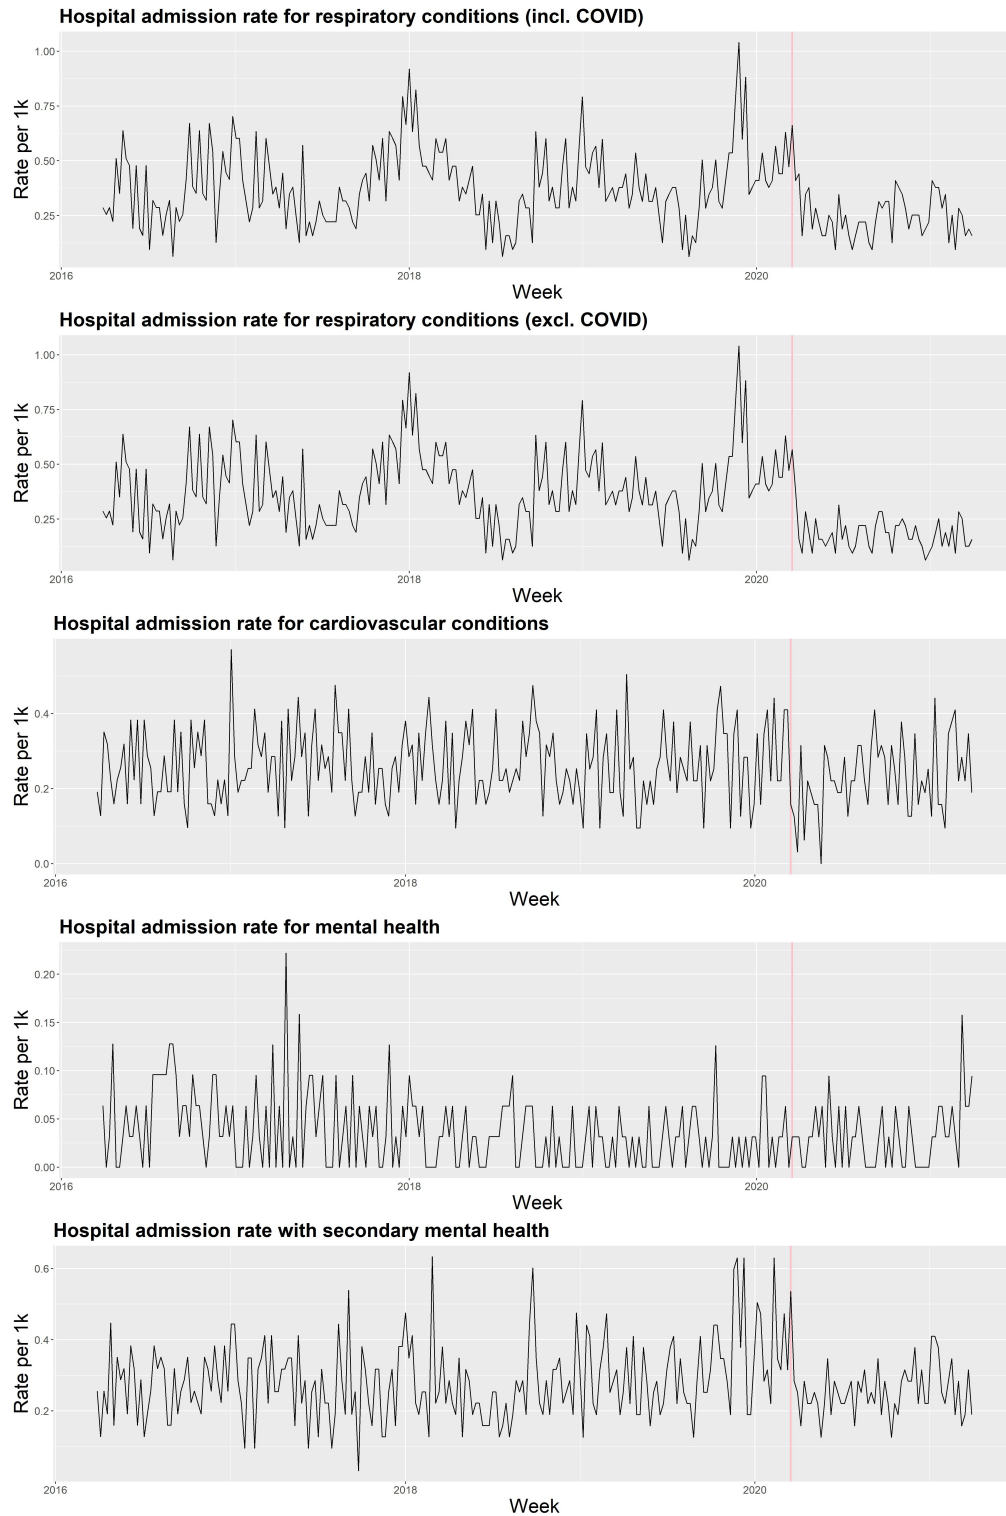

Figure 2: Weekly hospital admission rates stratified by selected primary diagnosis groups

260

261

262

Table 3: Proportion of hospital admissions and primary care diagnoses in selected patient groups

| Hospital admissions              |                   |                |                 |                      |
|----------------------------------|-------------------|----------------|-----------------|----------------------|
|                                  | Primary diagnosis | pre-March 2020 | post-March 2020 | p value <sup>1</sup> |
| Respiratory                      | No                | 0.57           | 0.63            |                      |
|                                  | Yes               | 0.43           | 0.37            | <0.01                |
|                                  | Yes (excl. Covid) | 0.43           | 0.27            | <0.01                |
| Cardiovascular                   | No                | 0.71           | 0.66            |                      |
|                                  | Yes               | 0.29           | 0.34            | <0.01                |
| Mental Health                    | No                | 0.96           | 0.95            |                      |
|                                  | Yes               | 0.04           | 0.05            | 0.30                 |
| Secondary Mental Health          | No                | 0.69           | 0.62            |                      |
|                                  | Yes               | 0.31           | 0.38            | <0.01                |
| Diagnosis in primary care        |                   |                |                 |                      |
|                                  | Patient group     | pre-March 2020 | post-March 2020 | p value <sup>1</sup> |
| Depression                       | 0-24              | 0.16           | 0.22            |                      |
|                                  | 25-64             | 0.75           | 0.67            |                      |
|                                  | 65+               | 0.10           | 0.11            | 0.04                 |
| Chronic kidney disease           | Female            | 0.56           | 0.30            |                      |
|                                  | Male              | 0.44           | 0.70            | <0.01                |
| Peripheral Arterial Disease      | Female            | 0.48           | 0.20            |                      |
|                                  | Male              | 0.52           | 0.80            | 0.02                 |
| Asthma                           | Most Deprived     | 0.66           | 0.52            |                      |
|                                  | Least Deprived    | 0.34           | 0.48            | 0.04                 |
| <sup>1</sup> X <sup>2</sup> test |                   |                |                 |                      |

## 263 Primary care

264 In primary care, there was a fall in the incidence rate of new diagnosis across several different diagnostic  
265 groups, although the patterns in the post-March 2020 period vary depending on diagnostic and demographic  
266 groups. Examples of differing patterns post-March 2020 are shown in Figure 3. These plots show the trend over  
267 time for the rate of new diagnoses in primary care for chronic obstructive pulmonary disease (COPD) and  
268 chronic kidney disease (CKD), both of which saw considerable and sustained falls in recorded new diagnoses.  
269 Diagnosis of hypertension also saw a sudden fall in Spring 2020, although the rates of new diagnoses have been  
270 increasing again since Summer 2020.

271 The changes in rates of new diagnoses between the pre- and post-March 2020 period were compared for each  
272 diagnostic group across different sexes, age groups, and areas of income deprivation (Table 3). There were  
273 significant differences in the proportion of diagnoses for depression among young people (aged up to 24  
274 years), which has grown in the post-March 2020 period. Additionally, a lower proportion of new diagnoses of  
275 chronic kidney disease (0.30 vs. 0.56,  $p < 0.01$ ) and peripheral arterial disease (0.48 vs. 0.20,  $p = 0.02$ ) were  
276 among women in the post-March 2020, the reverse of the relationship with sex and diagnosis in the years  
277 previous (Table 3). The proportion of new diagnoses for asthma among patients living in the most income  
278 deprived areas appears to have fallen in the post-March 2020 period (0.66 vs. 0.52,  $p = 0.04$ ).

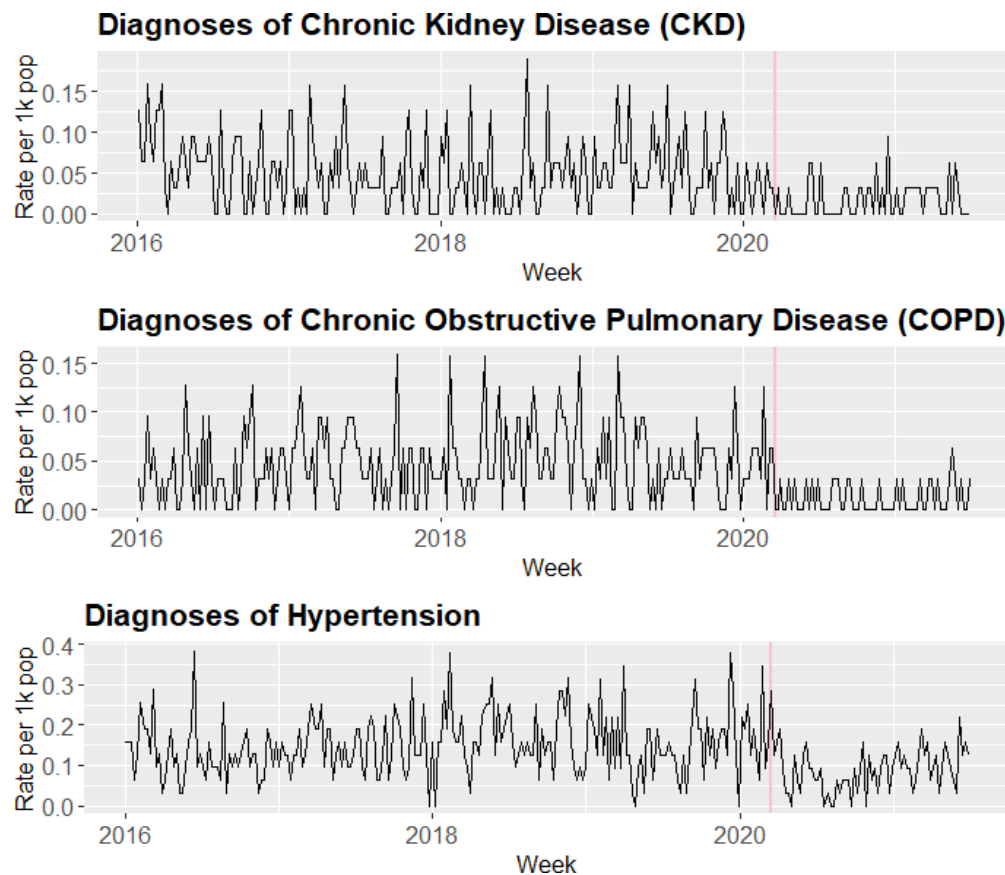

279

280 **Cancer**

281 While there were some changes in the characteristics of patients in Fleetwood registered as having  
 282 cancer, or receiving a cancer fast track referral, between the pre- and post- March 2020 temporal  
 283 periods, the differences did not reach statistical significance in univariate tests.

284

285 Table 4: Proportion of cancer registrations and fast track referrals in patient groups

|                                                                                       |             |               | pre-March<br>2020 | post-March<br>2020 | p<br>value <sup>1</sup> |
|---------------------------------------------------------------------------------------|-------------|---------------|-------------------|--------------------|-------------------------|
| Cancer registrations<br>(Jan 2016 – June 2021)                                        | Age band    | 0-24          | 0.01              | 0.00               |                         |
|                                                                                       |             | 25-64         | 0.27              | 0.32               |                         |
|                                                                                       |             | 65+           | 0.72              | 0.70               | 0.77                    |
|                                                                                       | Sex         | Female        | 0.49              | 0.42               |                         |
|                                                                                       |             | Male          | 0.51              | 0.58               | 0.28                    |
|                                                                                       | Income area | Most Deprived | 0.50              | 0.46               |                         |
| Least Deprived                                                                        |             | 0.50          | 0.54              | 0.66               |                         |
| Cancer fast track referrals<br>(June 2016 – June 2021)                                | Age band    | 0-24          | 0.00              | 0.00               |                         |
|                                                                                       |             | 25-64         | 0.25              | 0.24               |                         |
|                                                                                       |             | 65+           | 0.75              | 0.75               | 1                       |
|                                                                                       | Sex         | Female        | 0.53              | 0.51               |                         |
|                                                                                       |             | Male          | 0.47              | 0.49               | 0.73                    |
|                                                                                       | Income area | Most Deprived | 0.48              | 0.43               |                         |
| Least Deprived                                                                        |             | 0.52          | 0.57              | 0.38               |                         |
| <sup>1</sup> X <sup>2</sup> test for sex and income; Fisher’s exact test for age band |             |               |                   |                    |                         |

286

287 **Crime**

288 The number of street crime incidents in Fleetwood recorded by the police saw an increase in 2020,  
 289 particularly in the first half of that year. As the plots in Figure 4 suggest, the trend in overall street crime  
 290 in 2020 appears to be related to spikes in the number of anti-social behaviour incidents in that  
 291 period, which likely include the breaking of COVID-19-related restrictions.

292 While in the pre and post-March 2020 period, most crimes occurred in the most income deprived  
293 areas, the proportion of 'anti-social behaviour' and 'violence and sexual offences' crimes occurring in  
294 the most deprived areas fell post-March 2020, with a corresponding proportion increase in the least  
295 deprived areas (Table 4). Chi-squared tests indicated that this difference was only statistically  
296 significant for anti-social behaviour crimes (90.19% vs 88.75% in Most Deprived Areas,  $p < 0.01$ ) (Table  
297 4).

298

299

300

301

302

303

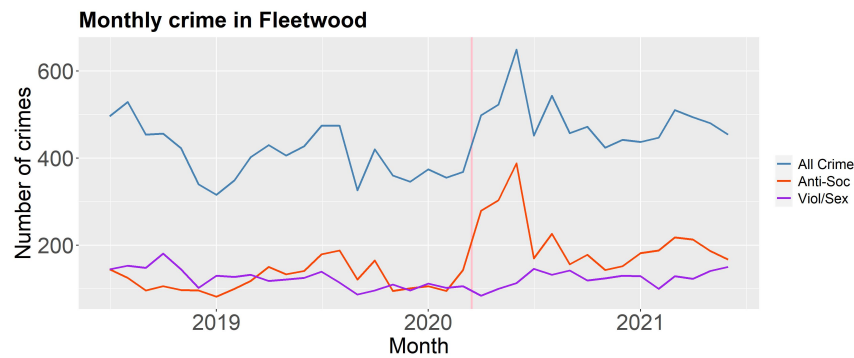

Figure 3: Number of monthly street crimes in Fleetwood stratified by the three largest crime categories

304 **Unemployment**

305 The rate of people receiving Universal Credit each month is comparable over time using the  
306 Alternative Claimant Count (ACC). This is an indication of the number of people who are receiving  
307 Universal Credit under the 'searching for work' condition, meaning they are required to look for  
308 work while receiving financial support.

309 Table 4 shows the monthly average ACC rate for Fleetwood in the pre- and post-March 2020 periods.  
310 It indicates there was a statistically significant increase in the rate of claimants per 1000 population  
311 post-March 2020 (27.4 vs 50.6,  $p < 0.01$ ). In the post-March 2020 period, existing differences between  
312 male and female claimants became larger, with a greater proportion of male claimants post-March  
313 2020 (Table 4).

314 Where available, variables have been stratified by income deprivation area, capturing differences  
315 between areas in Fleetwood among the 20% most deprived areas nationally ('Most' in Table 4) and  
316 those that are less deprived comparatively ('Least' in Table 4). Post-March 2020, the proportion of  
317 younger claimants and those living in the least deprived areas of Fleetwood grew (Table 4). Figure 5  
318 shows the time trends in claimant rates split by age.

319

320

Table 5: Group differences for selected social and economic indicators

321

pre and post-March 2020

|                              |                                  |              | pre-March<br>2020 | post-March<br>2020 | p<br>value <sup>1</sup> |        |
|------------------------------|----------------------------------|--------------|-------------------|--------------------|-------------------------|--------|
| All Crime                    | Income (%)                       | Most         | 89.48             | 89.27              | 0.4146                  |        |
|                              |                                  | Least        | 10.52             | 10.73              |                         |        |
| - Anti-Social<br>Behaviour   | Income (%)                       | Most         | 90.19             | 88.75              | < 0.01                  |        |
|                              |                                  | Least        | 9.81              | 11.25              |                         |        |
| - Violence and<br>Sexual Off | Income (%)                       | Most         | 90.78             | 89.93              | 0.0654                  |        |
|                              |                                  | Least        | 9.22              | 10.07              |                         |        |
| Unemployment<br>(ACC)        | Monthly rate <sup>2</sup>        | -            | 27.4              | 50.6               | < 0.01                  |        |
|                              |                                  | Age (%)      | 16-24             | 0.17               | 0.21                    | < 0.01 |
|                              |                                  |              | 25-49             | 0.56               | 0.56                    |        |
|                              |                                  |              | 50+               | 0.27               | 0.23                    |        |
|                              |                                  | Sex (%)      | Female            | 0.44               | 0.39                    | < 0.01 |
| Male                         | 0.56                             |              | 0.61              |                    |                         |        |
|                              | Income Area<br>(%)               | Most<br>Dep  | 0.81              | 0.73               | < 0.01                  |        |
|                              |                                  | Least<br>Dep | 0.19              | 0.27               |                         |        |
| Apprenticeships              | Monthly rate <sup>2</sup>        | -            | 21.9              | 25.0               | 0.1                     |        |
| NEET                         | Monthly rate <sup>2</sup>        | -            | 12.4              | 11.0               | 0.3                     |        |
| Free School<br>Meals         | Income area<br>rate <sup>2</sup> | Most<br>Dep  | 344               | 428                | < 0.01                  |        |
|                              |                                  | Least<br>Dep | 120               | 167                | 0.04                    |        |

322

<sup>1</sup> X<sup>2</sup> tests for group differences. T-test for differences in rates.

323

<sup>2</sup> Mean rate per 1000 population



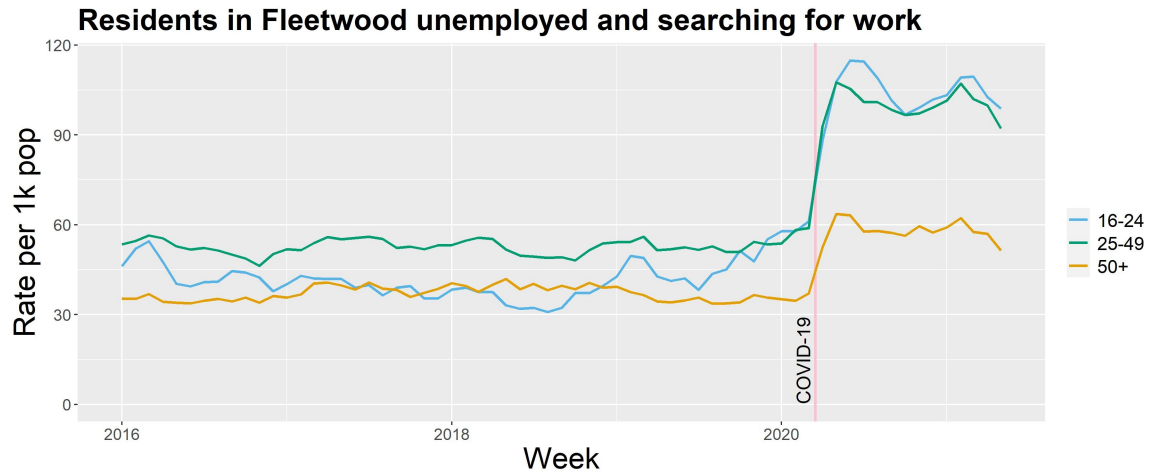

325

Figure 4: Rate of Fleetwood residents claiming Universal Credit under the 'Searching for Work' condition (Alternative Claimant Count)

326

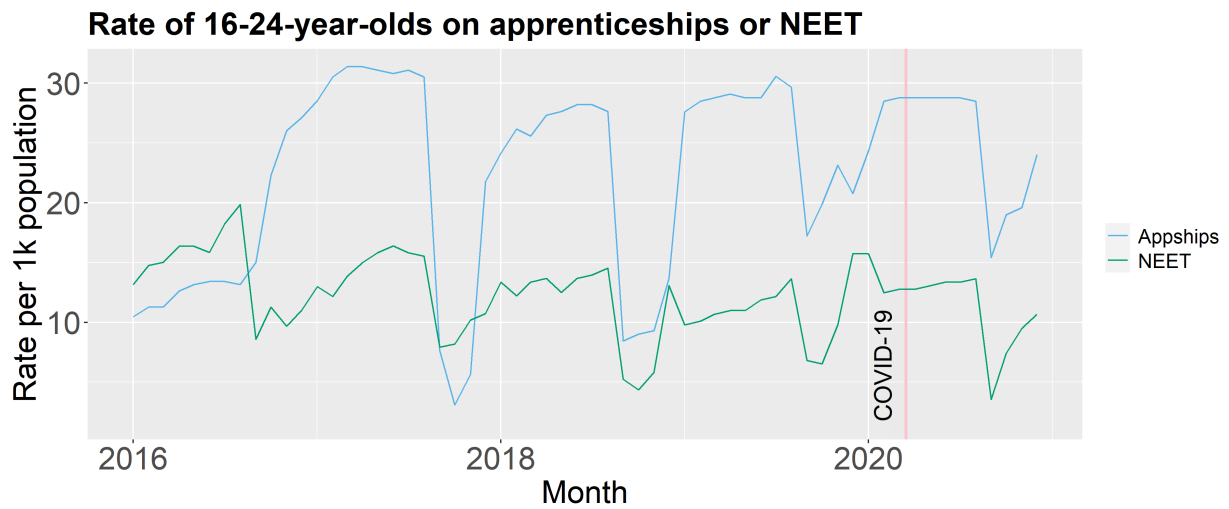

327

328

Figure 5: Rate of 16-24 year olds in Fleetwood on apprenticeships or NEET

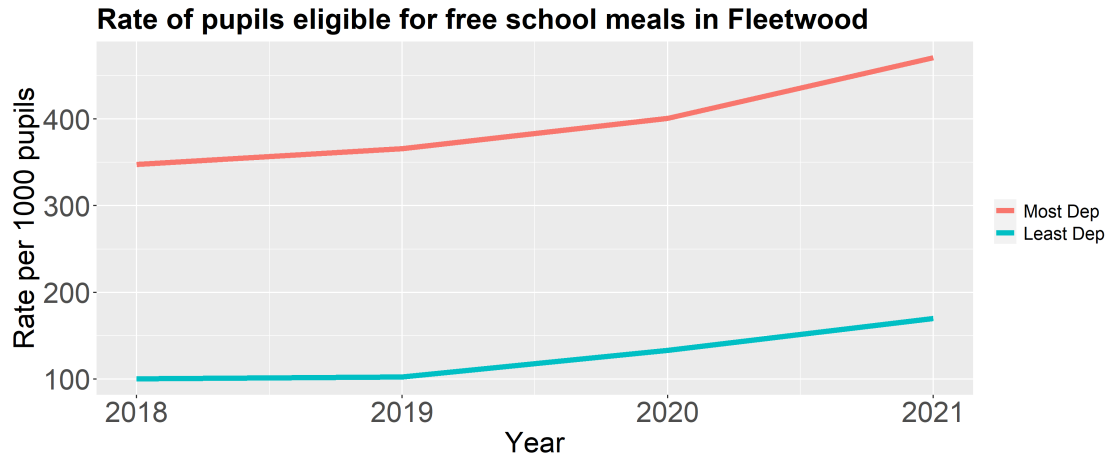

329

330

Figure 6: Rate of school pupils eligible to receive free school meals in Fleetwood

331

by income deprivation area

332

333

### School leaver opportunities

334

335

336

337

338

339

340

341

342

The study dataset includes information about the rate of 16-24-year-olds in Fleetwood either enrolled in an apprenticeship or 'Not in Education, Employment, or Training' (NEET) from 2016 until 2020. Since 2016 the rates of young people who are NEET appear to have been decreasing and the rates on apprenticeships appears moderately stable (Figure 6). Both appear to have seasonal trends, which likely correspond to school leaving dates. The mean monthly rates for each year in Table 5 suggest that 2020 rates appear to counter the trend somewhat, with rates of NEET increasing slightly and those on apprenticeships decreasing on the 2019 figure, although these changes are very small. Furthermore, when comparing the pre and post-March 2020 period, the post-March 2020 rates are higher overall, although this is not statistically significant (Table 4).

343

344

Table 6: Mean rate (per 1k) of 16-24 year olds on apprenticeships or NEET

| Year | Apprenticeships | NEET |
|------|-----------------|------|
| 2016 | 15.8            | 14.2 |
| 2017 | 23.6            | 12.9 |
| 2018 | 21.3            | 11.3 |
| 2019 | 26.1            | 10.8 |
| 2020 | 25.3            | 11.5 |

345

## 346 **Free School Meals**

347 As the plot in Figure 7 and summary statistics in Table 4 show, the mean rate of pupils entitled to receive  
348 free school meals per 1000 pupils grew in the post-COVID-19 period in both the most and least income  
349 deprived areas in Fleetwood. While the numbers of pupils eligible for free school meals is much higher in  
350 the most deprived areas both pre- and post-COVID-19, the rate of pupils eligible for free school meals  
351 per 1000 pupils increased by 40% in the least deprived areas (120 pre vs 167 post,  $p=0.04$ ), compared to  
352 24% in the most deprived areas (344 pre vs 428 post,  $p<0.01$ ).

## 353 **Discussion**

354 The findings reported in this manuscript are those from an exploratory analysis of routinely collected  
355 secondary health and socioeconomic data for Fleetwood residents. Temporal and spatial data were collected  
356 to examine differences in outcomes in different areas of Fleetwood, a socially deprived coastal town in  
357 North West England. While exploring mostly univariate associations between key variables of interest,  
358 these initial findings indicate the degree to which the health and social wellbeing of residents of  
359 Fleetwood have been impacted in the first 18 months following the COVID-19 pandemic. The results  
360 point towards some key areas that call for more comprehensive analysis using survival, multivariate time  
361 series and spatial analyses. These areas of interest include the large and sustained falls in hospital  
362 admissions for respiratory-related conditions, the changes in the age and sex demographics of incidence

363 of diagnosis in primary care, and indications of changes to some social outcomes in some of the least  
364 deprived areas of the towns.

365 The time trends of hospital admissions and primary care diagnoses, along with the statistical test of pre-  
366 and post-March 2020 differences, indicate the varied nature of the pandemic's impact on different  
367 patient populations. This corresponds to other study findings, suggestive of condition-varying patterns in  
368 healthcare use in the first six months of 2020 (4). Covering a longer time period, the data in this  
369 ongoing study indicates longer-term trends (18 months) of healthcare use in the post-March 2020  
370 period. Some of the most striking findings are the sustained falls in some healthcare outcomes related to  
371 non-COVID-19 respiratory conditions in this period. By June 2021, there were still no signs of the rate of  
372 new chronic obstructive pulmonary disease (COPD) diagnoses increasing to pre-March 2020 levels.  
373 However, low rates likely reflect the barrier to confirming a diagnosis of COPD using spirometry, a  
374 breathing examination temporarily not in use because of COVID-19 infection concerns (30). The  
375 Association for Respiratory Technology and Physiology (ARTP) and the Primary Care Respiratory Society  
376 (PCRS) estimate the number of patients awaiting a spirometry diagnosis to be around 200–250 patients  
377 per 500,000 population (30). While these will not all be COPD diagnoses, many patients with suspected  
378 COPD are likely to have been put on a 'waiting list' to be formally diagnosed before being placed on a  
379 COPD register. While some falls in diagnosis may relate to system barriers rather than patients not being  
380 seen in primary care, they could nonetheless lead to delays in care management and quicker  
381 deterioration for some patients. Additionally, the rate of hospital admissions where the primary  
382 diagnosis is a non-COVID-19 respiratory condition has also remained consistently low throughout the  
383 study period, suggesting that falls in admissions documented early on in the pandemic are persisting into  
384 2021 (7).

385 This exploratory analysis also points towards changing patterns to patient and population demographics  
386 of some health and socioeconomic outcomes in the pre- and post-March 2020 periods. Some of the  
387 associations in the pre- March 2020 period have been reversed, as is the case for women making up a  
388 much lower proportion of diagnoses for chronic kidney disease or peripheral arterial disease, a pattern  
389 not easily explained. Other trends may have more apparent explanations. For example, the increase in  
390 the proportion of depression diagnoses among young people aligns to a growing research literature  
391 pointing towards the impact the pandemic has had on that population group's mental wellbeing,  
392 who have experience substantial disruptions to school, social, and working life (31,7). Within this  
393 population, sub-groups may be particularly affected. There is evidence to suggest that among 16-25

394 years old, being female and having low social support were both predictors of mental distress during the  
395 pandemic (32). However, given that some of the most significant contributors to mental distress among  
396 young people during COVID have been reduced social support, activities, and increased loneliness, it  
397 may be that mental wellbeing will increase with greater social interactions (32). Assessing the longevity  
398 of this impact will require longitudinal research that follows this population over many years.

399 Several socioeconomic outcomes, including the rate of children eligible to receive free school meals,  
400 the number of street crimes, and unemployment, appear to have increased in the medium term in  
401 areas classified as the 'least deprived' in Fleetwood. This does not necessarily contradict suggestions  
402 made elsewhere that the COVID-19 pandemic will exacerbate social inequalities in health and social  
403 outcomes, with a greater impact on those experiencing socioeconomic disadvantage (19). The apparent  
404 changes in the 'least deprived' areas could indicate the pre-pandemic vulnerability of population groups  
405 experiencing moderate but not severe financial insecurity. When compared to all other  
406 neighbourhoods in England, the 'least deprived' areas in Fleetwood sit in the middle of national  
407 deprivation rankings. Other studies have suggested that those in middle-income housing, particularly  
408 those who were in work but on low pay, may have experienced the greatest financial disruption to  
409 their lives (17). It is possible that some residents in the 'least deprived' areas of Fleetwood were more  
410 vulnerable than others to the economic impacts of the pandemic.

## 411 **Conclusion**

412 There are early indications that the COVID-19 pandemic has had an impact on several health and social  
413 outcomes in Fleetwood, a predominantly socially deprived town in North West England. An exploratory  
414 analysis of these impacts suggests they may be patterned differently depending on health conditions,  
415 patient and population demographics, and area income deprivation. Examining these trends in  
416 multivariate analyses will test these associations and establish the strength of the impact on residents  
417 in this coastal community.

## 418      **References**

- 419      1.      Bambra C, Riordan R, Ford J, Matthews F. The COVID-19 pandemic and health inequalities. *J Epidemiol*  
420      *Community Health*. 2020 Jun 13; 74: 964-968
- 421      2.      Marmot M, Allen J, Goldblatt P, Herd E, Morrison J. Build Back Fairer: The COVID-19 Marmot Review.  
422      2020.
- 423      3.      Power M, Doherty B, Pybus K, Pickett K. How COVID-19 has exposed inequalities in the UK food system:  
424      The case of UK food and poverty [version 2; peer review: 5 approved]. *Emerald Open Res*. 2020 May 13;2(11)
- 425      4.      Mansfield KE, Mathur R, Tazare J, Henderson AD, Mulick AR, Carreira H, et al. Indirect acute effects of  
426      the COVID-19 pandemic on physical and mental health in the UK: a population-based study. *Lancet Digit Heal*.  
427      2021;3(4).
- 428      5.      Mulholland RH, Wood R, Stagg HR, Fischbacher C, Villacampa J, Simpson CR, et al. Impact of COVID-19  
429      on accident and emergency attendances and emergency and planned hospital admissions in Scotland: an  
430      interrupted time-series analysis. *J R Soc Med*. 2020;113(11):444–53.
- 431      6.      Xiong J, Lipsitz O, Nasri F, Lui LMW, Gill H, Phan L, et al. Impact of COVID-19 pandemic on mental  
432      health in the general population: A systematic review. *J Affect Disord*. 2020;277.
- 433      7.      Alsallakh MA, Sivakumaran S, Kennedy S, Vasileiou E, Lyons RA, Robertson C, et al. Impact of COVID-19  
434      lockdown on the incidence and mortality of acute exacerbations of chronic obstructive pulmonary disease:  
435      national interrupted time series analyses for Scotland and Wales. *BMC Med*. 2021 Dec 17;19(1).
- 436      8.      Sykes DL, Faruqi S, Holdsworth L, Crooks MG. Impact of COVID-19 on COPD and asthma admissions,  
437      and the pandemic from a patient’s perspective. *ERJ Open Res*. 2021 Jan;7(1).
- 438      9.      Grabowski D, Overgaard M, Meldgaard J, Johansen LB, Willaing I. Disrupted Self-Management and  
439      Adaption to New Diabetes Routines: A Qualitative Study of How People with Diabetes Managed Their Illness  
440      during the COVID-19 Lockdown. *Diabetology*. 2021 Jan 12;2(1).
- 441      10.      Chen S, Jones PB, Underwood BR, Moore A, Bullmore ET, Banerjee S, et al. The early impact of COVID-  
442      19 on mental health and community physical health services and their patients’ mortality in Cambridgeshire  
443      and Peterborough, UK. *J Psychiatr Res*. 2020;131.

- 444 11. Chen S, She R, Qin P, Kershenbaum A, Fernandez-Egea E, Nelder JR, et al. The Medium-Term Impact of  
445 COVID-19 Lockdown on Referrals to Secondary Care Mental Health Services: A Controlled Interrupted Time  
446 Series Study. *Front Psychiatry*. 2020;11.
- 447 12. Carr MJ, Steeg S, Webb RT, Kapur N, Chew-Graham CA, Abel KM, et al. Effects of the COVID-19  
448 pandemic on primary care-recorded mental illness and self-harm episodes in the UK: a population-based  
449 cohort study. *Lancet Public Heal* [Internet]. 2021;6(2):e124--e135. Available from:  
450 [http://dx.doi.org/10.1016/S2468-2667\(20\)30288-7](http://dx.doi.org/10.1016/S2468-2667(20)30288-7)
- 451 13. Boden M, Zimmerman L, Azevedo KJ, Ruzek JI, Gala S, Abdel Magid HS, et al. Addressing the mental  
452 health impact of COVID-19 through population health. *Clin Psychol Rev* [Internet]. 2021;85(July 2020):102006.  
453 Available from: <https://doi.org/10.1016/j.cpr.2021.102006>
- 454 14. Pierce M, Hope H, Ford T, Hatch S, Hotopf M, John A, et al. Mental health before and during the  
455 COVID-19 pandemic: a longitudinal probability sample survey of the UK population. *The Lancet Psychiatry*.  
456 2020 Oct;7(10).
- 457 15. Witteveen D. Sociodemographic inequality in exposure to COVID-19-induced economic hardship in the  
458 United Kingdom. *Research in Social Stratification and Mobility*. 2020;69.
- 459 16. Fana M, Torrejón Pérez S, Fernández-Macías E. Employment impact of Covid-19 crisis: from short term  
460 effects to long terms prospects. *J Ind Bus Econ* [Internet]. 2020;47(3):391–410. Available from:  
461 <https://doi.org/10.1007/s40812-020-00168-5>
- 462 17. Brewer M, Gardiner L. The initial impact of COVID-19 and policy responses on household incomes.  
463 *Oxford Rev Econ Policy*. 2020;36:S187–99.
- 464 18. HM Treasury, The Rt Hon Rishi Sunak MP. The Chancellor Rishi Sunak provides an updated statement  
465 on coronavirus. [Internet]. 2021 [cited 2021 Oct 20]. Available from:  
466 [https://www.gov.uk/government/speeches/the-chancellor-rishi-sunak-provides-an-updated-statement-on-](https://www.gov.uk/government/speeches/the-chancellor-rishi-sunak-provides-an-updated-statement-on-coronavirus)  
467 [coronavirus](https://www.gov.uk/government/speeches/the-chancellor-rishi-sunak-provides-an-updated-statement-on-coronavirus)
- 468 19. Whitehead M, Taylor-Robinson D, Barr B. Poverty, health, and covid-19. *BMJ*. 2021 Feb 12; 372
- 469 20. Food Standards Scotland. COVID-19 Consumer Tracker. 2020;(May).

- 470 21. Nghiem N, Wilson N. Potential impact of COVID-19 related unemployment on increased cardiovascular  
471 disease in a high-income country: Modeling health loss, cost and equity. PLoS One [Internet]. 2021;16(5  
472 May):1–14. Available from: <http://dx.doi.org/10.1371/journal.pone.0246053>
- 473 22. Witteveen D, Velthorst E. Economic hardship and mental health complaints during COVID-19. Proc Natl  
474 Acad Sci U S A. 2020;117(44):27277–84.
- 475 23. Spencer M. “Healthier fleetwood”: Creating healthier communities via improved social networking in a  
476 disadvantaged area of the UK. Br J Diabetes Vasc Dis. 2017;17(3):107–10.
- 477 24. Ministry of Housing Communities & Local Government. English indices of deprivation 2019. Index of  
478 multiple deprivation [Internet]. 2019. Available from: [https://www.gov.uk/government/statistics/english-  
479 indices-of-deprivation-2019](https://www.gov.uk/government/statistics/english-indices-of-deprivation-2019)
- 480 25. Bishop P. Knowledge diversity and entrepreneurship following an economic crisis: an empirical study of  
481 regional resilience in Great Britain. Entrep Reg Dev [Internet]. 2019 May 27;31(5–6):496–515. Available from:  
482 <https://doi.org/10.1080/08985626.2018.1541595>
- 483 26. Brown R, Cowling M. The geographical impact of the Covid-19 crisis on precautionary savings, firm  
484 survival and jobs: Evidence from the United Kingdom’s 100 largest towns and cities. International small  
485 business journal. 2021.
- 486 27. Office for National Statistics. Population Estimates – local authority based on five year age bands. 2020  
487 June 24.
- 488 28. Davenport A, Farquharson C, Rasul I, Sibieta L, Stoye G. The geography of the COVID-19 crisis in  
489 England [Internet]. 2020 [cited 2021 May 10]. Available from:  
490 <https://www.nuffieldfoundation.org/news/geographic-impact-covid-19-crisis-diffuse>
- 491 29. Whitty C. Chief Medical Officer’s annual report 2021: health in coastal communities. 2021.
- 492 30. Association for Respiratory Technology and Physiology, Primary Care Respiratory Society, British  
493 Thoracic Society. Risk minimisation in spirometry re-start. 2021.
- 494 31. Ravens-Sieberer U, Kaman A, Erhart M, Devine J, Schlack R, Otto C. Impact of the COVID-19 pandemic  
495 on quality of life and mental health in children and adolescents in Germany. European Child Adolescent



496      Psychiatry. 2021 jan.

497      32.      Rens E, Smith P, Nicaise P, Lorant V, Van den Broeck K. Mental Distress and Its Contributing Factors

498      Among Young People During the First Wave of COVID-19: A Belgian Survey Study. *Frontiers in Psychiatry*. 2021

499      jan;12.

500
